# Supplementary material for: Goat SNX29: mRNA expression, InDel and CNV detection, and their associations with litter size
Source: Frontiers journal article supplement (doi:10.3389/fvets.2022.981315), 2022-08-10
Supplement: Image_1.pdf [file Image_1.pdf]

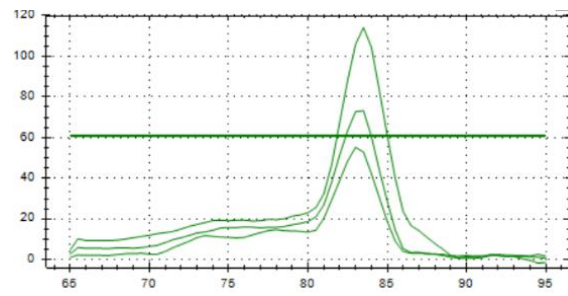

**Figure S1.** The melting curve of CNV1.
